# Supplementary material for: Forest migration outpaces tree species range shift across North America
Source: Research Square preprint supplement (doi:10.21203/rs.3.rs-840978/v1), 2021-08-23
Supplement: Supplementary file 3 [file ded318fc6beb9768027758f1.xlsx]

## Sheet: Sheet1
Scientific name	Common name	Present classification	Past classification	Species migration	mean distance shift (km decade-1)	se distance shift (km decade-1)	mean bearing	se bearing	mean present area (km2)	mean past area (km2)	mean area change (%)	se area change (%)	Present sampling year	Past sampling
Abies amabilis	Pacific silver fir	W
Abies balsamea	balsam fir	EB	EB	EB	501.963	4.7258	108.787	0.0288651	330285	371779	-5.31062	0.125399	2006.81	1990.01
Abies concolor	white fir	W	W	W	80.4436	4.66818	173.411	0.626112	16874.8	20212.1	-9.54045	0.192767	2008.96	1995.14
Abies grandis	grand fir	W	W	W	116.017	2.87012	124.612	0.45583	21021.9	31947.1	-14.9263	0.270126	2009.75	1991.47
Abies lasiocarpa	subalpine fir	W	W	W	52.5969	1.46033	327.577	0.343515	122817	106018	6.30278	0.256153	2010.33	1990.14
Abies magnifica	California red fir	W
Abies procera	noble fir	W
Abies shastensis	Shasta red fir	W
Acer barbatum	Florida maple	E	E	E	157.218	1.74388	306.497	1.47282	1086.74	425.183	54.1591	0.876103	2008.29	1985.26
Acer macrophyllum	bigleaf maple	W	W	W	36.3277	2.14283	259.874	35.9497	5730.44	7669.72	-19.0459	0.549143	2008.65	1998.08
Acer negundo	boxelder	E	E	E	100.723	1.90945	104.763	1.28291	5215.93	1908.17	72.2654	0.505774	2008.85	1989.65
Acer nigrum	red maple	E	E	E	118.019	3.69648	123.829	1.44925	213.188	153.168	17.2143	0.691325	2008.75	1990.44
Acer pensylvanicum	striped maple	EB	EB	EB	92.7585	2.63622	239.019	1.48277	10498.3	9246.15	6.44212	0.24343	2009.22	1992.33
Acer platanoides	Norway maple	E
Acer rubrum	red maple	EB	EB	EB	25.215	0.389194	213.658	1.43404	191707	186137	1.33127	0.0308337	2008.05	1990.02
Acer saccharinum	silver maple	E	E	E	38.4314	2.52761	207.802	10.7323	1423.78	2134.62	-14.5612	0.380048	2008.36	1990.15
Acer saccharum	sugar maple	EB	EB	EB	65.5924	1.96659	257.157	1.88892	117774	129139	-3.92154	0.0646866	2007.69	1989.75
Acer spicatum	mountain maple	EB	EB	EB	223.774	5.93863	283.707	0.201878	7151.08	7077.69	0.521037	0.457616	2008.63	1990.27
Aesculus flava	yellow buckeye	E
Aesculus glabra	Ohio buckeye	E
Aesculus spp			E
Ailanthus altissima	ailanthus	E	E	E	54.9221	2.72645	170.598	4.06929	922.071	278.903	117.877	1.64135	2008.2	1992.5
Albizia julibrissin	mimosa, silktree	E
Alnus incana	gray alder	EB	EB	EB	359.417	35.6234	116.129	15.8945	36125.7	605.971	3821.67	249.385	2005.44	1991.4
Alnus rhombifolia	white alder	W
Alnus rubra	red alder	W	W	W	100.579	2.47225	334.659	0.826351	16384.7	20442.9	-15.2545	0.468247	2008.81	1998.42
Amelanchier arborea	common serviceberry	E
Amelanchier spp			EB
Arbutus menziesii	Pacific madrone	W	W	W	52.1106	3.41818	333.692	0.797821	3397.35	3935.3	-9.00633	0.210254	2008.47	1996.29
Asimina triloba	pawpaw	E	E	E	141.84	9.77247	218.385	1.64713	1364.77	269.726	188.094	2.99155	2008.7	1991.36
Betula alleghaniensis	yellow birch	EB	EB	EB	31.199	5.81355	163.235	15.8297	49802.9	55642.8	-5.04389	0.116441	2007.32	1990.69
Betula lenta	sweet birch	E	E	E	51.9574	1.16545	238.329	0.254641	12998.8	10055.6	12.9774	0.109157	2009.21	1991.18
Betula neoalaskana	resin birch	B
Betula nigra	river birch	E	E	E	118.549	8.22322	229.636	1.22807	1552.04	1418.16	4.08926	0.353842	2007.93	1989.32
Betula papyrifera	paper birch	WEB	WEB	WEB	65.8253	4.30371	280.933	0.808553	201740	250248	-9.15309	0.112287	2006.88	1989.94
Betula populifolia	gray birch	EB	EB	EB	80.4514	7.78935	301.899	1.09654	9207.29	10705.5	-6.51836	0.0973047	2009.46	1992.31
Calocedrus decurrens	incense cedar	W	W	W	44.5416	6.58878	185.558	13.711	5605.48	7662.64	-15.7003	0.312615	2008.73	1995.08
Carpinus caroliniana	American hornbeam, musclewood	E	E	E	49.1352	0.300581	237.01	0.13834	11002	9428.75	6.57104	0.00761503	2008.52	1988.22
Carya alba	mockernut hickory	E
Carya aquatica	water hickory	E
Carya cordiformis	bitternut hickory	E
Carya glabra	pignut hickory	E
Carya illinoinensis	pecan	E
Carya laciniosa	shellbark hickory	E
Carya ovalis	red hickory	E
Carya ovata	shagbark hickory	E
Carya pallida	sand hickory	E
Carya spp			E
Carya texana	black hickory	E
Castanea dentata	American chestnut	E	E	E	31.9974	1.1875	251.216	0.489388	262.902	560.952	-24.1924	0.0314419	2008.55	1990.96
Castanea pumila	Allegheny chinkapin		E
Celtis laevigata	sugarberry	E	E	E	5.32803	0.0387273	239.046	0.639684	3960.48	3667.57	2.64409	0.00113384	2008.87	1984.71
Celtis occidentalis	hackberry	E	E	E	20.4839	0.0446584	329.579	0.303923	2625.84	2288.69	6.36994	0.028381	2007.82	1989.25
Cercis canadensis	eastern redbud	E	E	E	19.312	0.0069367	129.042	0.310779	3293.86	2492.49	13.7962	0.0330549	2007.81	1989.18
Chamaecyparis lawsoniana	Port-Orford-cedar	W
Chamaecyparis nootkatensis	Alaska yellow-cedar	W	W	W	113.424	2.47059	136.5	0.403536	19522.6	15300.7	17.3434	0.5417	2009.35	1996.57
Chamaecyparis thyoides	Atlantic white-cedar	E	E	E	236.335	0.664136	223.584	0.150818	543.59	683.244	-8.06193	0.0695047	2010.29	1989.79
Chrysolepis chrysophylla	giant chinkapin, golden chinkapin	W	W	W	86.9871	6.80368	222.251	8.5933	895.292	989.421	-7.12267	1.73414	2008.43	1998.58
Cornus florida	flowering dogwood	E	E	E	39.9352	0.0673126	263.168	0.0329544	17145.8	33133.7	-19.6336	0.00117767	2007.51	1987.84
Cornus nuttallii	Pacific dogwood	W	W	W	224.035	9.13095	166.649	0.574732	334.907	977.078	-41.8415	0.359346	2008.75	1996.22
Crataegus spp			E
Diospyros virginiana	common persimmon	E	E	E	13.3492	0.132902	109.081	0.613258	4475.15	4078.95	3.63735	0.00319177	2008.45	1987.04
Fagus grandifolia	American beech	EB	EB	EB	72.9547	1.56414	246.426	0.997832	52496.7	56918.5	-3.4744	0.0463894	2008.76	1990.88
Fraxinus americana	white ash	EB	EB	EB	139.176	11.4062	127.8	1.58529	26569	31048.1	-6.29308	0.107989	2008.98	1990.66
Fraxinus latifolia	Oregon ash	W
Fraxinus nigra	black ash	EB	EB	EB	55.3001	4.67952	191.845	9.71216	18584.6	24352.5	-9.05405	0.178175	2008.29	1987.39
Fraxinus pennsylvanica	green ash	EB	E	E	119.798	0.110387	54.471	0.134104	14351.4	7048.42	39.7227	0.0172666	2008.24	1987.37
Fraxinus quadrangulata	blue ash	E	E	E	112.39	1.33789	192.223	0.322084	156.036	89.5249	32.5953	0.0474684	2007.26	1989.03
Gleditsia aquatica	waterlocust		E
Gleditsia triacanthos	honeylocust	E	E	E	114.601	0.878026	258.549	0.258801	722.185	1301.97	-17.2982	0.00202886	2008.97	1988.4
Gordonia lasianthus	loblolly-bay	E	E	E	204.397	0.338371	225.395	0.0119729	1564.75	712.972	40.9264	0.00621143	2008.31	1984.98
Halesia carolina	Carolina silverbell	E
Ilex opaca	American holly	E	E	E	62.5155	0.095922	244.389	0.0312691	5881.21	3629.78	25.3384	0.0289003	2008.4	1988.81
Juglans cinerea	butternut	E	EB	E	50.0377	0.606781	137.313	0.883169	416.485	394.524	2.19662	0.0361946	2009.63	1989.55
Juglans nigra	black walnut	E	E	E	54.562	0.448327	300.163	1.04298	3307.08	3456.85	-1.86004	0.0456454	2008.79	1990.18
Juniperus occidentalis	western juniper	W
Juniperus virginiana	eastern redcedar	E	E	E	56.223	0.00771407	253.792	0.0448521	17068.8	12973.8	13.4145	0.0111141	2008.28	1989.43
Larix laricina	tamarack	EB	EB	EB	96.4944	4.26196	105.713	0.649977	78418.3	58501.9	13.4192	0.299348	2008.79	1988.46
Larix occidentalis	western larch	W	W	W	125.272	1.86821	125.266	0.456165	16754.3	40209.5	-23.6697	0.199083	2009.57	1989.87
Liquidambar styraciflua	sweetgum	E	E	E	7.97221	0.0710505	47.7879	0.12866	66302	63856.2	1.42524	0.00394744	2008.03	1986.52
Liriodendron tulipifera	yellow-poplar	E	E	E	24.471	0.010567	234.566	0.0354668	37468.8	31456.4	8.59056	0.000726487	2007.96	1990.17
Lithocarpus densiflorus	tanoak	W	W	W	56.3099	3.08222	334.119	0.608158	6970.2	7793.5	-5.95209	0.201642	2008.75	1994.61
Maclura pomifera	Osage-orange	E	E	E	35.6629	0.248848	258.144	1.55379	504.512	629.985	-8.08858	0.00393153	2008.78	1989.06
Magnolia acuminata	cucumbertree	E	E	E	32.334	0.48586	31.9602	0.337865	1086.11	1205.53	-4.04041	0.0322424	2008.82	1989.11
Magnolia fraseri	mountain or Fraser magnolia	E
Magnolia grandiflora	southern magnolia	E	E	E	36.7769	0.41186	236.252	10.0149	568.024	628.059	-3.11617	0.113609	2008.91	1984.42
Magnolia macrophylla	bigleaf magnolia	E	E	E	59.7243	1.42938	227.646	7.70956	246.937	196.519	9.03631	0.408704	2007.46	1984.71
Magnolia tripetala	umbrella magnolia	E
Magnolia virginiana	sweetbay	E	E	E	21.7699	0.109843	299.823	2.35268	5844.22	5329.35	3.02481	0.0335924	2008.6	1983.26
Malus spp			E
Melia azedarach	chinaberry	E
Morus alba	white mulberry	E	E	E	267.604	2.554	28.713	0.201248	173.605	163.605	2.3205	0.3155	2009.08	1988.16
Morus rubra	red mulberry	E	E	E	68.3067	0.132859	328.808	0.159835	773.754	1268.57	-15.084	0.0294118	2008.11	1987.43
Nyssa aquatica	water tupelo	E	E	E	18.357	0.577889	261.537	3.80072	3448.86	3401.21	0.459057	0.0622058	2008.37	1984.16
Nyssa biflora	swamp tupelo	E	E	E	26.5095	0.170127	252.46	0.242185	8500.78	10541	-6.85463	0.00375462	2007.59	1985.08
Nyssa sylvatica	blackgum	E	E	E	24.4859	0.0901982	20.9162	0.200508	25969.1	27670.4	-2.36161	0.00232922	2008.41	1987.6
Ostrya virginiana	eastern hophornbeam	EB	EB	EB	176.899	4.85819	251.215	0.879226	16755.7	15030.3	4.77341	0.214272	2008.37	1989.06
Oxydendrum arboreum	sourwood	E	E	E	66.1051	0.173095	244.998	0.0529253	11031.6	11293.7	-0.961647	0.0162782	2007.46	1988.18
Paulownia tomentosa	paulownia, empress-tree	E
Persea borbonia	redbay	E	E	E	75.5838	0.0878636	68.7712	0.107215	3069.69	1638.04	35.5704	0.0550546	2007.89	1988.23
Picea abies	Norway spruce	E	E	E	171.637	0.184877	63.8437	0.14058	2457.31	920.977	82.6613	0.208383	2008.57	1992.42
Picea engelmannii	Engelmann spruce	W	W	W	18.8175	0.884321	77.1329	5.66692	78609	76531.4	1.12691	0.287606	2010.14	1990.29
Picea glauca	white spruce	WEB	EB	EB	43.05	2.40344	264.988	1.68472	321318	458929	-14.6453	0.127113	2006.95	1990.58
Picea mariana	black spruce	EB	EB	EB	109.242	3.02	294.077	0.18708	995965	841447	8.52497	0.0776159	2006.95	1989.72
Picea pungens	blue spruce	W
Picea rubens	red spruce	EB	EB	EB	51.1652	2.89909	251.521	2.43987	33975.1	42683.9	-10.0826	0.145068	2008.49	1992.32
Picea sitchensis	Sitka spruce	W	W	W	504.775	3.91721	293.361	0.179309	25494.3	87964.9	-51.0297	0.292321	2008.85	1997.73
Pinus albicaulis	whitebark pine	W	W	W	177.593	4.0831	132.723	0.310334	8910.18	24175.3	-24.2172	0.226891	2010.31	1989.48
Pinus attenuata	knobcone pine	W
Pinus banksiana	jack pine	EB	EB	EB	40.8029	3.76169	116.251	0.821811	270428	451779	-17.3454	0.142391	2007.75	1989.24
Pinus clausa	sand pine	E	E	E	19.6443	0.075182	271.75	5.53039	1544.82	1185.03	7.46944	0.00988599	2010.43	1977.88
Pinus contorta	lodgepole pine	WB	WB	WB	36.656	1.94666	335.889	1.5289	203507	210547	-1.32749	0.161547	2009.7	1989.69
Pinus echinata	shortleaf pine	E	E	E	44.3422	0.0332267	326.37	0.17191	17737.9	40943	-19.2628	0.00471457	2009.03	1985.49
Pinus elliottii	slash pine	E	E	E	14.1534	0.00662211	130.105	0.264737	29942.6	32828	-2.69855	0.018552	2009.18	1983.22
Pinus flexilis	limber pine	W	W	W	223.854	6.77604	133.255	0.352375	2703.06	6976.19	-24.1601	0.273399	2010.36	1990.12
Pinus glabra	spruce pine	E	E	E	24.7624	1.68512	44.609	0.265756	397.411	627.287	-11.8975	0.00109985	2008.21	1983.51
Pinus jeffreyi	Jeffrey pine	W
Pinus lambertiana	sugar pine	W	W	W	39.2402	5.41248	176.956	3.26987	2230.01	2430.7	-4.52734	0.346794	2008.9	1994.38
Pinus monticola	western white pine	W	W	W	60.441	2.74439	138.598	2.3205	3596.62	9875.9	-27.1128	0.343335	2009.5	1990.84
Pinus palustris	longleaf pine	E	E	E	24.2312	0.242531	72.1566	0.043001	8677.48	13846.1	-10.8535	0.00242288	2009.23	1981.73
Pinus ponderosa	ponderosa pine	W	W	W	38.826	3.01248	132.517	3.26268	34955	39305.6	-5.91466	0.195068	2009.48	1994.54
Pinus pungens	Table Mountain pine	E	E	E	25.9864	0.0198618	376.972	0.627827	218.878	312.44	-13.9838	0.0127789	2009.45	1992.34
Pinus resinosa	red pine	EB	EB	EB	60.4488	4.28271	247.159	5.61296	15792.6	25456.9	-15.8342	0.0755008	2008.09	1988.91
Pinus rigida	pitch pine	E	E	E	18.2437	0.383658	78.6084	0.492308	4223.32	4256.92	-0.345505	0.0600001	2010.83	1992.55
Pinus serotina	pond pine	E	E	E	144.421	3.00106	44.2201	0.35631	1946.31	4872.72	-17.0041	0.0551844	2007.8	1979.58
Pinus strobiformis	southwestern white pine	W	W	W	127.527	11.2831	176.438	27.4555	438.386	450.369	-1.46298	0.974215	2010.86	1997.75
Pinus strobus	eastern white pine	EB	EB	EB	34.3313	0.852721	198.556	3.97232	49235.1	45126	4.2785	0.141593	2008.22	1991.17
Pinus sylvestris	Scotch pine	E	E	E	118.618	0.642306	93.1216	0.176648	1865.04	1404.22	14.7363	0.0589265	2007.99	1990.18
Pinus taeda	loblolly pine	E	E	E	41.9623	0.0379879	244.486	0.0163007	159633	123816	10.7991	0.00110114	2008.39	1986.96
Pinus virginiana	Virginia pine	E	E	E	11.1458	0.0920163	225.974	0.172522	12525.6	15573.1	-8.62195	0.00708473	2007.37	1989.2
Planera aquatica	water-elm, planertree	E	E	E	82.2228	0.0327556	226.312	0.187326	798.569	715.802	3.65904	0.0361686	2010.59	1985.35
Platanus occidentalis	American sycamore	E	E	E	4.27088	0.173913	299.871	5.11412	3316.98	2991.64	4.65546	0.0713502	2008.44	1989.74
Populus balsamifera	balsam poplar	WEB	WEB	WEB	105.206	3.34069	285.98	0.644735	69316.9	107999	-13.99	0.149315	2007.9	1987.43
Populus deltoides	eastern cottonwood	E	E	E	139.094	0.576196	174.721	0.109679	565.275	749.925	-11.6948	0.0421487	2008.42	1991.6
Populus grandidentata	bigtooth aspen	EB	EB	EB	50.2344	1.80776	219.075	2.47211	11806.5	20861.1	-19.0164	0.0809758	2007.11	1988.86
Populus tremuloides	quaking aspen	WEB	WEB	WEB	72.2599	2.44911	122.94	0.37141	391665	565576	-12.5344	0.120958	2008.1	1988.49
Prunus americana	American plum	E	E	E	314.06	0.684273	130.574	0.374927	204.963	135.891	23.5623	0.0501968	2009.04	1991.79
Prunus avium	sweet cherry, domesticated	E
Prunus emarginata	bitter cherry	W
Prunus pensylvanica	pin cherry	EB	EB	EB	184.244	13.8818	105.173	0.552694	10603.5	17002.6	-18.0463	0.178638	2007.18	1990.51
Prunus serotina	black cherry	EB	EB	EB	166.5	1.03375	198.479	3.19664	33654.9	33513.4	0.187965	0.107794	2008.53	1990.15
Prunus virginiana	chokecherry	E	E	E	97.9824	0.378314	165.987	0.801495	858.779	1676.36	-20.241	0.0831494	2008.93	1989.66
Pseudotsuga menziesii	Douglas-fir	W	W	W	24.7455	1.50618	148.288	0.945456	156066	158560	-0.780912	0.121697	2009.22	1993.15
Quercus agrifolia	California live oak	W
Quercus alba	white oak	E	E	E	18.8048	0.00171195	251.266	0.0557561	50803.9	58295.7	-5.28904	0.00175725	2008.23	1988.78
Quercus bicolor	swamp white oak	E	E	E	84.9495	0.211487	55.6799	16.952	154.938	647.97	-32.1916	0.0172316	2008.43	1989.5
Quercus chrysolepis	canyon live oak	W	W	W	19.5811	1.69016	309.733	6.41982	5886.08	3845.23	29.3701	0.369818	2008.84	1994.38
Quercus coccinea	scarlet oak	E	E	E	5.93453	0.110821	152.217	1.23439	10595.2	14013.5	-10.697	0.00707826	2008.01	1989.77
Quercus ellipsoidalis	northern pin oak	E	E	E	38.152	0.37766	141.724	0.144966	2379.78	1499.25	22.917	0.0180221	2007.99	1987.49
Quercus falcata	southern red oak	E	E	E	21.2766	0.0848751	48.6569	0.0205265	12834	17642.7	-9.85058	0.000944848	2008.22	1986.09
Quercus garryana	Oregon white oak	W	W	W	39.2172	3.31692	292.806	30.8645	1091.43	3223.95	-42.8917	0.243952	2009.05	1996.71
Quercus ilicifolia	scrub oak	E
Quercus imbricaria	shingle oak	E	E	E	72.698	1.14395	271.695	0.122812	601.333	533.822	5.56803	0.0131261	2008.18	1990.33
Quercus incana	bluejack oak	E
Quercus kelloggii	California black oak	W	W	W	32.3952	1.51935	139.179	1.93958	3907.5	5595.16	-16.9931	0.104433	2008.84	1994.63
Quercus laevis	turkey oak	E	E	E	28.9821	2.03248	337.272	16.0837	602.464	1624.19	-23.2683	0.033701	2007.86	1986.27
Quercus laurifolia	laurel oak	E	E	E	15.0036	0.03512	290.811	0.575998	8825.19	7315.12	7.30324	0.00407244	2007.87	1985.31
Quercus lyrata	overcup oak	E	E	E	27.056	0.0744159	252.727	0.617454	1533.44	2419.36	-11.7152	0.0126039	2009.45	1984.33
Quercus macrocarpa	bur oak	E	E	E	4.89188	0.0522042	305.159	1.03203	2502.79	2464.69	0.532185	0.0347943	2009.43	1986.31
Quercus margarettiae	dwarf post oak	E	E	E	151.035	0.184622	129.827	0.24691	298.397	588.952	-18.639	0.00492171	2006.78	1985.61
Quercus marilandica	blackjack oak	E	E	E	89.6297	0.156502	269.604	0.0724611	2139.34	5512.74	-22.0605	0.00224967	2009.1	1986.92
Quercus michauxii	swamp chestnut oak	E	E	E	24.3487	0.552888	50.0319	0.0913816	373.707	994.517	-22.3229	0.0251575	2007.92	1985.57
Quercus muehlenbergii	chinkapin oak	E	E	E	35.6124	0.0692859	101.05	0.237431	2351.04	1658.88	17.5621	0.0187872	2007.59	1988.59
Quercus nigra	water oak	E	E	E	26.519	0.0355493	255.449	0.041216	30882.7	24008.3	10.3525	0.00315544	2008.21	1986.09
Quercus pagoda	cherrybark oak	E	E	E	20.6558	0.512424	260.72	0.232824	2726.43	3729.64	-9.00432	0.00993511	2009.28	1985.38
Quercus palustris	pin oak	E	E	E	90.3586	2.11375	306.426	1.19382	489.707	713.013	-13.831	0.148611	2009.1	1990.97
Quercus phellos	willow oak	E	E	E	51.4385	0.449787	61.9334	0.107226	3428.77	4753.82	-9.60773	0.0152546	2008.79	1985.54
Quercus prinus	chestnut oak	E	E	E	62.7685	0.142474	236.693	0.0206004	23106.6	27147.3	-6.40676	0.00286915	2008.34	1989.78
Quercus rubra	northern red oak	EB	EB	EB	19.9204	1.91326	283.723	21.8459	39583.5	42884	-3.2283	0.0648696	2008.38	1989.32
Quercus shumardii	Shumard oak	E	E	E	148.459	0.0259178	313.729	0.0705001	360.148	247.526	15.6808	0.0298579	2009.01	1985.8
Quercus stellata	post oak	E	E	E	15.6775	0.0326058	310.979	0.519368	18752.9	26803.3	-10.766	0.0072676	2009.09	1986.77
Quercus texana	Texas red oak	E	E	E	27.7099	1.59582	242.035	0.296422	1058.12	842.254	7.75477	0.0505792	2009.99	1983.35
Quercus velutina	black oak	E	E	E	20.0002	0.0610075	41.4901	17.7096	22605.9	30327.3	-10.5445	0.000183439	2008.35	1989.03
Quercus virginiana	live oak	E	E	E	46.6797	0.133898	272.523	0.150913	3118.61	2313.5	10.1639	0.0141344	2008.73	1981.35
Quercus wislizeni	interior live oak	W
Robinia pseudoacacia	black locust	E	E	E	52.556	0.183341	263.19	0.203434	8151.46	7687.89	2.57086	0.0284971	2008.96	1990.34
Sabal palmetto	cabbage palmetto	E	E	E	17.808	0.0800389	91.3601	0.0802152	1648.26	1199.05	11.335	0.0393401	2009.86	1983.5
Salix amygdaloides	peachleaf willow	E
Salix bebbiana	Bebb willow	E
Salix nigra	black willow	E
Salix spp			EB
Sassafras albidum	sassafras	E	E	E	12.9537	0.106477	251.225	0.0518507	8775.9	10683.9	-7.52441	0.0199317	2008.14	1989.15
Sequoia sempervirens	redwood	W	W	W	24.2273	4.15874	213.057	9.23387	3782.68	4408.99	-7.55206	0.248121	2009.11	1994.07
Sideroxylon lanuginosum	chittamwood, gum bumelia	E	E	E	167.918	0.327203	252.437	0.272122	148.817	157.188	-1.80754	0.0845251	2009.76	1986.41
Sorbus americana	American mountain-ash	EB	EB	EB	85.2799	11.898	148.405	13.2079	3170.64	4359.99	-13.7911	0.339508	2006.87	1991.03
Taxodium ascendens	pondcypress	E	E	E	8.01898	0.022792	108.563	0.371095	4041.29	5712.65	-8.08139	0.0116929	2009.47	1980.4
Taxodium distichum	baldcypress	E	E	E	16.8119	0.304736	303.951	2.37246	4913.43	4340.9	4.09473	0.0514423	2009.12	1983.2
Taxus brevifolia	Pacific yew	W
Thuja occidentalis	northern white-cedar	EB	EB	EB	90.4443	2.98429	294.059	0.349516	66674.2	69407.1	-1.81777	0.152129	2007.07	1989.9
Thuja plicata	western redcedar	W	W	W	15.8631	0.836859	253.437	5.98735	32585.1	35074.8	-3.32707	0.478328	2009.57	1992.96
Tilia americana	American basswood	EB	EB	EB	103.538	6.01137	163.875	3.85937	9304.44	12127.6	-9.22018	0.0970553	2008.24	1988.06
Triadica sebifera	Chinese tallowtree	E
Tsuga canadensis	eastern hemlock	EB	EB	EB	54.3912	4.19426	259.469	2.43995	38467.2	32843.3	7.86216	0.134132	2008.79	1991.42
Tsuga heterophylla	western hemlock	W	W	W	71.8082	1.04014	216.603	0.818977	84242.4	118597	-17.8125	0.327317	2009.25	1996.27
Tsuga mertensiana	mountain hemlock	W	W	W	89.3555	2.85912	315.759	1.31243	44373	52389.6	-8.93294	0.642325	2009.2	1995.72
Ulmus alata	winged elm	E	E	E	41.9574	0.00301517	74.4064	0.0488557	14725.2	10635.2	14.029	0.0272217	2008.87	1986.93
Ulmus americana	American elm	EB	EB	EB	81.9855	0.968477	219.757	1.115	14410	16744.4	-5.46105	0.0582718	2008.5	1988.18
Ulmus crassifolia	cedar elm	E	E	E	108.65	0.141784	274.438	0.186288	570.508	921.864	-11.9485	0.0235079	2009.14	1983.67
Ulmus rubra	slippery elm	E	E	E	36.9274	0.0645822	226.835	0.0323985	3963.17	4012.76	-0.549373	0.0369867	2008.22	1989.33
Ulmus thomasii	rock elm	E	E	E	118.039	0.964752	341.591	0.555514	102.139	429.602	-30.8191	0.0733894	2007.95	1988.2
Umbellularia californica	California-laurel	W	W	W	38.8354	4.25493	195.964	13.2493	1820.91	1824.66	-0.0826473	0.454296	2008.78	1995.42
