# Supplementary material for: Forest migration outpaces tree species range shift across North America
Source: Research Square preprint supplement (doi:10.21203/rs.3.rs-840978/v1), 2021-08-23
Supplement: Supplementary file 5 [file 251733970cb2931e9035988d.xlsx]

## Sheet: Sheet1
Forest type	Biome	Forest type name	Mean centroid shift ± se (km decade-1)	Mean bearing of shift (°)	Percent area change	Mean year present	Mean year past	Silhouette width present (mean±95CI)	Silhouette width past (mean±95CI)	Direction
W-A	PCF	Sitka spruce—western hemlock	432.64±0.45	296	-0.42	2009	1998	0.52±0.00	0.63±0.00	W
W-B	PCF	mountain hemlock—cedar—spruce	270.7±0.21	317	-0.06	2009	1996	0.35±0.00	0.54±0.00	N
W-C	PCF	western hemlock—cedar—spruce	18.18±0.08	184	-0.02	2009	1997	0.35±0.00	0.47±0.00	S
W-D	PCF	red alder—Douglas-fir	156.75±0.19	328	0.28	2009	1999	0.10±0.00	0.28±0.02	N
W-E	PCF	fir—hemlock				2009		0.33±0.00		N
W-F	PCF	yellow-cedar—hemlock					1997		0.38±0.00	N
W-G	WC	pure and mixed lodgepole pine forest	39.98±0.08	156	0.09	2010	1990	0.55±0.00	0.58±0.01	S
W-H	WC	Northern Rocky Mountains cedar—larch—hemlock	36.55±0.06	353	0.15	2010	1992	0.13±0.02	0.23±0.01	N
W-I	WC	grand fir—Douglas-fir	15.38±0.04	44	0.08	2010	1991	0.33±0.04	0.32±0.03	N
W-J	WC	aspen-mixed conifer	199.72±0.41	311	0.1	2010	1991	0.42±0.02	0.53±0.00	W
W-K	WC	subalpine fir—Engelmann spruce	19±0.05	111	0.12	2010	1990	0.30±0.01	0.37±0.01	E
W-L	WC	white fir—Douglas-fir—ponderosa pine	40.61±0.2	273	-0.13	2009	1995	0.33±0.03	0.36±0.01	W
W-M	WC	Engelmann spruce—subalpine fir	75.87±0.19	144	-0.19	2010	1991	0.29±0.00	0.28±0.02	S
W-N	WC	whitebark—lodgepole pine—subalpine fir					1989		0.34±0.00	N
W-O	WC	western larch—Douglas-fir					1991		0.02±0.05	N
W-P	MC	coastal redwood—tanoak	6.76±0.06	370	0.15	2009	1994	0.23±0.01	0.34±0.02	N
W-Q	MC	California mixed oak woodland	122.89±0.11	175	-0.19	2009	1996	-0.01±0	-0.01±0	S
W-R	CIR	Douglas-fir mixed forest	47.99±0.08	299	0.04	2009	1993	0.50±0.00	0.53±0.01	W
W-S	CIR	ponderosa pine—fir	21.19±0.26	353	0.05	2010	1995	0.51±0.00	0.70±0.02	N
E-A	EMF	red oak mixed hardwood forest	229.59±0.1	109	0.08	2009	1988	-0.02±0	-0.01±0	E
E-B	EMF	Great Lakes tamarack—spruce	80.36±0.26	288	0.1	2009	1987	0.44±0.00	0.37±0.00	W
E-C	EMF	North-central maple forest	155.01±0.1	88	0.28	2007	1990	0.27±0.02	0.34±0.00	E
E-D	EMF	beech—maple	73.59±0.07	248	-0.23	2010	1992	0.25±0.01	0.15±0.03	W
E-E	EMF	Great Lakes pine forest	86.67±0.2	300	0.51	2008	1989	0.20±0.06	0.33±0.00	W
E-F	EMF	red maple—hardwood	12.53±0.09	263	-0.1	2009	1990	0.27±0.01	0.26±0.01	W
E-G	EMF	eastern hemlock—maple	37.64±0.08	77	0.37	2009	1992	0.26±0.00	0.20±0.01	E
E-H	EMF	northern white-cedar—balsam fir	213.41±0.2	271	-0.11	2007	1990	0.34±0.00	0.32±0.00	W
E-I	EMF	balsam fir—maple—yellow birch	17.69±0.06	267	-0.07	2007	1991	0.07±0.01	0.11±0.02	W
E-J	EMF	eastern white pine—maple	108.75±0.13	268	0	2009	1992	0.26±0.02	0.27±0.00	W
E-K	EMF	Great Lakes black ash—poplar	104.47±0.13	118	-0.15	2009	1986	0.14±0.02	0.06±0.00	E
E-L	EMF	black cherry—maple				2009		0.17±0.00		N
E-M	CF	oak—hickory	100.64±0.08	93	-0.02	2008	1989	0.12±0.00	0.14±0.01	E
E-N	CF	Appalachian oak–pine	36.79±0.06	221	-0.1	2008	1990	0.10±0.01	0.06±0.01	S
E-O	CF	mixed oak—hickory	9.59±0.05	206	0.2	2009	1987	0.01±0.00	0.11±0.01	S
E-P	CF	yellow-poplar—maple	34.96±0.04	85	0	2008	1990	0.08±0.01	0.03±0.01	E
E-Q	CF	eastern redcedar—white ash—American elm	89.15±0.09	243	0.03	2008	1990	-0.04±0	-0.04±0.01	W
E-R	SP	slash pine mixed	13.64±0.04	148	0.03	2009	1983	0.55±0.00	0.57±0.00	S
E-S	SP	loblolly pine—sweetgum	41.15±0.07	249	-0.08	2008	1987	0.48±0.01	0.38±0.00	W
E-T	SP	green ash-mixed floodplain forest	28.16±0.06	368	-0.04	2009	1986	-0.07±0	-0.05±0	N
E-U	SP	longleaf mixed pine	29.78±0.09	72	-0.03	2009	1982	0.16±0.01	0.19±0.01	E
E-V	SP	southern lowland mixed forest	23.9±0.07	254	-0.06	2008	1984	-0.07±0	-0.09±0	W
E-W	SP	sweetgum—water oak—loblolly pine	22.24±0.06	73	-0.01	2008	1986	0.06±0.01	0.10±0.00	E
E-X	SP	Virginia pine—maple	13.36±0.04	178	-0.04	2008	1989	0.05±0.02	0.17±0.01	S
E-Y	SP	loblolly pine—sweetgum mixed				2008		0.14±0.00		N
E-Z	SP	shortleaf–loblolly pine					1985		0.26±0.00	N
B-A	BF	quaking aspen—balsam fir—paper birch	683.32±0.08	115	-0.28	2008	1988	0.28±0.01	0.25±0.03	E
B-B	BF	paper birch—balsam fir	84.89±0.09	94	0.12	2007	1990	0.11±0.03	0.17±0.02	E
B-C	BF	jack pine—black spruce	72.3±0.05	268	-0.19	2008	1989	0.32±0.03	0.39±0.00	W
B-D	BF	balsam fir—black spruce	51.59±0.03	190	-0.05	2007	1990	0.32±0.01	0.32±0.00	S
B-E	BF	black spruce—balsam fir	313.25±0.07	282	0.33	2007	1990	0.48±0.02	0.48±0.02	W
B-F	BF	white spruce—lodgepole pine				2007		0.16±0.00		N
