# Supplementary material for: Forest migration outpaces tree species range shift across North America
Source: Research Square preprint supplement (doi:10.21203/rs.3.rs-840978/v1), 2021-08-23
Supplement: Supplementary file 6 [file 7dd06d9c6d6ef3c8b77829d7.xlsx]

## Sheet: Sheet1
Location	Citation	Dimension	Time	Margin	Life stage	Tree species	Migration speed (km decade-1)	Direction
Quebec	Boisvert-Marsh et al. (2014)1	Latitude	1970-1977 vs. 1992-2002	Median	Saplings (1.1 to 3.0 cm DBH)	Abies balsamea	2.72984	S
						Acer rubrum	8.23825	N
						Acer saccharum	4.04446	N
						Betula alleghaniensis	0.0942929	N
						Betula papyrifera	0.625393	N
						Fagus grandifolia	0.535941	N
						Ostrya virginiana	0.0396974	S
						Picea glauca	9.11254	S
						Picea mariana	19.0065	S
						Populus tremuloides	12.9939	S
						Thuja occidentalis	3.96534	N
					Adults (DBH ≥ 9.1 cm)	Abies balsamea	1.90094	N
						Acer rubrum	0.774189	S
						Acer saccharum	0.521065	N
						Betula alleghaniensis	0.972714	N
						Betula papyrifera	1.35002	S
						Fagus grandifolia	0.779097	S
						Ostrya virginiana	0.0843582	S
						Picea glauca	3.42461	N
						Picea mariana	4.98416	N
						Populus tremuloides	0.729597	N
						Thuja occidentalis	2.23822	N
				Northern limit	Saplings (1.1 to 3.0 cm DBH)	Abies balsamea	8.73332	S
						Acer rubrum	9.25186	N
						Acer saccharum	3.92577	N
						Betula alleghaniensis	4.34286	N
						Betula papyrifera	16.4429	N
						Fagus grandifolia	5.50864	N
						Ostrya virginiana	1.77657	N
						Picea glauca	10.7769	S
						Picea mariana	4.3011	S
						Populus tremuloides	10.6981	N
						Thuja occidentalis	3.22118	N
					Adults (DBH ≥ 9.1 cm)	Abies balsamea	5.22316	N
						Acer rubrum	1.80669	N
						Acer saccharum	2.26315	N
						Betula alleghaniensis	2.43704	N
						Betula papyrifera	7.70018	S
						Fagus grandifolia	1.25062	S
						Ostrya virginiana	0.987552	S
						Picea glauca	4.36843	N
						Picea mariana	4.38033	N
						Populus tremuloides	2.32336	S
						Thuja occidentalis	0.655153	N
Quebec	Sittaro et al. (2017)2	Latitude	1970-1978 vs. 2000-2012	Northern limit	Adults (DBH ≥ 9 cm)	Acer rubrum	2.65	N
						Acer saccharum	1.08	N
						Betula alleghaniensis	0.46	S
						Betula populifolia	6.87	N
						Fagus grandifolia	1.41	S
						Fraxinus americana	12.06	S
						Fraxinus nigra	0.22	S
						Ostrya virginiana	0.39	S
						Picea rubens	0.64	N
						Pinus strobus	11.31	N
						Populus grandidentata	3.65	N
						Quercus rubra	0.36	N
						Thuja occidentalis	0.03	S
						Tilia americana	1.72	N
						Tsuga canadensis	0.12	N
						Ulmus americana	3.68	N
					Saplings (1-9 cm DBH)	Acer rubrum	3.29	N
						Acer saccharum	4.61	N
						Betula alleghaniensis	2.81	N
						Betula populifolia	3.91	S
						Fagus grandifolia	3.91	N
						Fraxinus americana	5.18	S
						Fraxinus nigra	4.38	N
						Ostrya virginiana	4.46	N
						Picea rubens	0.95	N
						Pinus strobus	3.04	N
						Populus grandidentata	9.08	N
						Quercus rubra	5.31	N
						Thuja occidentalis	0.22	N
						Tilia americana	11.51	N
						Tsuga canadensis	5.44	N
						Ulmus americana	6.21	S
Eastern USA	Fei et al. (2017)6	Latitude/Longitude	1980-1995 vs. 2013-2015	Mean	All	Abies balsamea	7.7	NW
						Juniperus virginiana	64.6	SW
						Larix laricina	29.1	NW
						Picea glauca	100.2	SW
						Picea mariana	33.9	NE
						Picea rubens	6.7	NE
						Pinus banksiana	18.1	NE
						Pinus echinata	54.6	NW
						Pinus elliottii	11.7	SW
						Pinus glabra	5.5	NE
						Pinus palustris	32.3	NE
						Pinus resinosa	49.1	NW
						Pinus rigida	34.7	NE
						Pinus serotina	7.9	NE
						Pinus strobus	45.2	NW
						Pinus taeda	4.1	SE
						Pinus virginiana	13.9	SW
						Taxodium distchum	24.4	NE
						Taxodium ascendens	6.3	SW
						Thuja occidentalis	20.1	NE
						Tsuga canadensis	14	NE
						Acer negundo	9.6	SW
						Acer pensylvanicum	6.1	NE
						Acer rubrum	14.4	NW
						Acer saccharinum	30.4	SW
						Acer saccharum	22.7	SW
						Aesculus spp.	19.8	NW
						Betula alleghaniensis	26.4	NE
						Betula lenta	22.8	SW
						Betula papyrifera	18.1	NE
						Betula populifolia	28	NE
						Carpinus caroliniana	15.9	NW
						Carya spp.	14.1	NW
						Celtis spp.	25.8	NW
						Cercis canadensis	17.3	SW
						Diospyros virginiana	28.9	SW
						Fagus grandifolia	16.2	SW
						Fraxinus spp.	52.2	NW
						Fraxinus nigra	11.7	NW
						Gleditsia triacanthos	70.8	SW
						Gordonia lasianthus	3.7	NW
						Ilex opaca	15.1	SW
						Juglans nigra	17.3	NW
						Liquidambar styraciflua	2.6	NE
						Liriodendron tulipifera	10.1	SW
						Maclura pomifera	38	NW
						Magnolia acuminata	23.9	NE
						Magnolia virginiana	26.9	SW
						Nyssa aquatica	41.3	SW
						Nyssa sylvatica	17.6	NE
						Ostrya virginiana	34.6	NW
						Oxydendrum arboreum	7	NE
						Persea borbonia	26.2	SW
						Platanus occidentalis	14.1	SW
						Populus balsamifera	2.1	NE
						Populus deltoides	59.4	NW
						Populus grandidentata	60	NW
						Populus tremuloides	62	NW
						Prunus spp.	46.6	SW
						Quercus alba	17.2	SW
						Quercus bicolor	37.3	NW
						Quercus coccinea	69.9	NW
						Quercus falcata	14.9	SW
						Quercus pagoda	3.6	SW
						Quercus imbricaria	29.7	SW
						Quercus laevis	12.3	SW
						Quercus laurifolia	21.3	SW
						Quercus lyrata	11.2	SE
						Quercus macrocarpa	5.8	SW
						Quercus marilandica	46.8	NW
						Quercus michauxii	24.7	SW
						Quercus muehlenbergii	10.3	NE
						Quercus nigra	23.2	SW
						Quercus palustris	14.5	NW
						Quercus phellos	9.9	NW
						Quercus prinus	5.9	NE
						Quercus rubra	16.8	NW
						Quercus shumardii	50.6	NW
						Quercus stellata	17.1	NW
						Quercus velutina	20.5	NW
						Quercus virginiana	25.2	NW
						Robinia pseudoacacia	23.2	NW
						Salix spp.	90.7	SW
						Sassafras albidum	11.7	NW
						Tilia spp.	18.1	NW
						Ulmus spp.	35.6	SW
Eastern USA	Iverson et al. (2008)85	Latitude/Longitude	1961-1990 vs. 2100 (Average of three climate models under the A1FI emission scenario)	Mean	All	Abies balsamea	23.6	E
						Acer barbatum	8.64	W
						Acer negundo	6.24	SW
						Acer nigrum	2.56	S
						Acer pensylvanicum	4.16	W
						Acer rubrum	12.32	W
						Acer saccharinum	8.96	E
						Acer saccharum	16.8	NE
						Acer spicatum	42.48	SE
						Aesculus glabra	38.8	N
						Aesculus octandra	2.64	E
						Alnus glutinosa	6.32	NE
						Asimina triloba	40.16	NE
						Betula alleghaniensis	3.36	SE
						Betula lenta	16.8	NE
						Betula nigra	7.44	N
						Betula papyrifera	7.92	NW
						Betula populifolla	6.24	NW
						Bumelia lanuginosa	9.76	E
						Carpinus caroliniana	3.2	N
						Carya aquatica	3.28	NE
						Carya cordiformis	26.72	E
						Carya glabra	13.2	N
						Carya illinoensis	44.32	NE
						Carya laciniosa	43.36	NE
						Carya ovata	20.16	NE
						Carya texana	61.6	E
						Carya tomentosa	12.32	NE
						Castanea dentata	8.08	SW
						Catalpa speciosa	28	N
						Celtis laevigata	40.56	NE
						Celtis occidentalis	25.84	NE
						Cercis canadensis	33.52	NE
						Chamaecyparis thyoides	15.52	NE
						Cornus florida	17.76	NE
						Diospyros virginiana	34.24	NE
						Fagus grandifolia	10.72	W
						Fraxinus americana	11.52	W
						Fraxinus nigra	4.32	SW
						Fraxinus pennsylvanica	5.2	SE
						Fraxinus quadrangulata	4	SE
						Gleditsia aquatica	56.48	NE
						Gleditsia triacanthos	24.24	NE
						Gordonia lasianthus	1.6	NW
						Gymnocladus dioicus	23.52	N
						Halesia spp.	0.64	N
						Ilex opaca	8.16	SW
						Juglans cinerea	20.4	NE
						Juglans nigra	34.72	N
						Juniperus virginiana	30.08	NE
						Larix laricina	5.12	W
						Liquidambar styraciflua	12.96	NE
						Liriodendron tuliperfia	13.36	N
						Maclura pomifera	20.32	NE
						Magnolia acuminata	4.56	E
						Magnolia grandiflora	12.64	E
						Magnolia macrophylla	12.72	NE
						Magnolia virginiana	11.68	E
						Morus rubra	31.92	NE
						Nyssa aquatica	5.52	NE
						Nyssa ogechee	2.4	N
						Nyssa sylvatica	0.72	W
						Nyssa sylvatica var. biflora	8.4	NE
						Ostrya virginiana	6.88	SE
						Oxydendrum arboreum	4.4	NW
						Persea borbonia	2.4	E
						Picea glauca	36.4	W
						Picea mariana	21.2	W
						Picea rubens	9.12	W
						Pinus banksiana	8.08	SW
						Pinus clausa	20.88	W
						Pinus echinata	29.28	NE
						Pinus elliottii	11.84	N
						Pinus glabra	14.88	NE
						Pinus palustris	17.12	NE
						Pinus pungens	1.28	SW
						Pinus resinosa	12	N
						Pinus rigida	4.16	W
						Pinus serotina	5.36	SW
						Pinus strobus	16.24	NW
						Pinus taeda	12.72	NE
						Pinus virginiana	10.56	N
						Planera aquatica	1.76	NW
						Platanus occidentallis	14.72	NE
						Populus balsamifera	22.32	SW
						Populus deltoides	18	NE
						Populus grandidentata	20.88	NE
						Populus tremuloides	5.68	S
						Prunus americana	6.56	E
						Prunus pensylvanica	27.6	NE
						Prunus serotina	4.8	W
						Prunus virginiana	52.32	NW
						Quercus alba	18.56	NE
						Quercus bicolor	30.64	N
						Quercus coccinea	36.96	NE
						Quercus durandii	4.08	NE
						Quercus ellipsoidalis	19.44	SW
						Quercus falcata var.falcata	16	NE
						Quercus falcata var.pagodifolia	13.84	NE
						Quercus ilicifolia	7.44	W
						Quercus imbricaria	25.68	NE
						Quercus laevis	8.64	NW
						Quercus laurifolia	5.84	NE
						Quercus lyrata	9.36	N
						Quercus macrocarpa	5.76	N
						Quercus marilandica	13.28	SE
						Quercus michauxii	45.6	NE
						Quercus muehlenbergii	7.84	NE
						Quercus nigra	40.4	NE
						Quercus nuttallii	19.92	N
						Quercus palustris	12.8	E
						Quercus phellos	13.2	NE
						Quercus prinus	10.4	NE
						Quercus rubra	16	N
						Quercus shumardii	13.44	NE
						Quercus stellata	32.24	NE
						Quercus stellata var.margaretta	42.24	NE
						Quercus velutina	26.48	NE
						Quercus virginiana	40.8	NW
						Robinia pseudoacacia	45.68	NW
						Salix amygdaloides	28.16	S
						Salix nigra	1.76	SE
						Sassafras albidum	12.24	NE
						Sorbus americana	20.16	SE
						Taxodium distichum	11.6	NE
						Taxodium distichum var. nutans	51.84	W
						Thuja occidentalis	4.64	SE
						Tilia americana	6.08	W
						Tsuga canadensis	2.08	NE
						Ulmus alata	43.44	NE
						Ulmus americana	8.88	NE
						Ulmus crassifolia	54.64	NE
						Ulmus rubra	16.24	NE
						Ulmus thomasii	12.88	E
			1961-1990 vs. 2100 (Average of three climate models under the B1 emission scenario)			Abies balsamea	19.6154	E
						Acer barbatum	4.30769	SW
						Acer negundo	4.38462	W
						Acer nigrum	0.769231	W
						Acer pensylvanicum	3.53846	N
						Acer rubrum	4.15385	NW
						Acer saccharinum	10.6923	NE
						Acer saccharum	11.1538	NE
						Acer spicatum	38.4615	E
						Aesculus glabra	23.6154	N
						Aesculus octandra	1.76923	E
						Alnus glutinosa	8.61538	NE
						Asimina triloba	22.7692	NE
						Betula alleghaniensis	5.92308	NE
						Betula lenta	15.5385	NE
						Betula nigra	10.5385	N
						Betula papyrifera	5	N
						Betula populifolla	4.46154	NW
						Bumelia lanuginosa	3.92308	NE
						Carpinus caroliniana	1.38462	NE
						Carya aquatica	2	E
						Carya cordiformis	8.61538	E
						Carya glabra	13.3846	NE
						Carya illinoensis	25.6923	NE
						Carya laciniosa	30	NE
						Carya ovata	16.9231	NE
						Carya texana	43.9231	E
						Carya tomentosa	8	NE
						Castanea dentata	3.07692	SW
						Catalpa speciosa	18.5385	NW
						Celtis laevigata	26.2308	NE
						Celtis occidentalis	18.6154	NE
						Cercis canadensis	23.6923	NE
						Chamaecyparis thyoides	16.3846	SW
						Cornus florida	12.6923	NE
						Diospyros virginiana	19.2308	NE
						Fagus grandifolia	4.69231	NW
						Fraxinus americana	5.92308	NW
						Fraxinus nigra	4.38462	N
						Fraxinus pennsylvanica	2.76923	NE
						Fraxinus quadrangulata	3.84615	SE
						Gleditsia aquatica	35.1538	E
						Gleditsia triacanthos	17.5385	NE
						Gordonia lasianthus	1.53846	NW
						Gymnocladus dioicus	11.3077	N
						Halesia spp.	0.384615	NW
						Ilex opaca	8.23077	SW
						Juglans cinerea	20.8462	N
						Juglans nigra	21.4615	N
						Juniperus virginiana	22.9231	NE
						Larix laricina	2.46154	NW
						Liquidambar styraciflua	7.61538	NE
						Liriodendron tuliperfia	6.46154	N
						Maclura pomifera	12	NE
						Magnolia acuminata	6.15385	NE
						Magnolia grandiflora	4.30769	SW
						Magnolia macrophylla	1.76923	NW
						Magnolia virginiana	3	NE
						Morus rubra	21.2308	NE
						Nyssa aquatica	2.92308	NE
						Nyssa ogechee	2.23077	NW
						Nyssa sylvatica	0.769231	NW
						Nyssa sylvatica var. biflora	2.61538	NE
						Ostrya virginiana	0.538462	N
						Oxydendrum arboreum	3.92308	NW
						Persea borbonia	2.38462	W
						Picea glauca	0.846154	SW
						Picea mariana	10.3846	E
						Picea rubens	7.84615	W
						Pinus banksiana	5.69231	NW
						Pinus clausa	12	NW
						Pinus echinata	17.7692	NE
						Pinus elliottii	6.46154	N
						Pinus glabra	4	N
						Pinus palustris	4.61538	N
						Pinus pungens	2.38462	SW
						Pinus resinosa	9.84615	N
						Pinus rigida	0.615385	NE
						Pinus serotina	2	NW
						Pinus strobus	19.1538	NW
						Pinus taeda	6.61538	N
						Pinus virginiana	5.61538	NW
						Planera aquatica	2.15385	N
						Platanus occidentallis	11.5385	NE
						Populus balsamifera	6.38462	SW
						Populus deltoides	13.0769	NE
						Populus grandidentata	13.0769	NE
						Populus tremuloides	6.69231	NE
						Prunus americana	3.69231	N
						Prunus pensylvanica	15.7692	N
						Prunus serotina	8.84615	NW
						Prunus virginiana	22.4615	NW
						Quercus alba	14.9231	NE
						Quercus bicolor	12.9231	NW
						Quercus coccinea	27.8462	NE
						Quercus durandii	0.615385	NE
						Quercus ellipsoidalis	6.69231	NW
						Quercus falcata var.falcata	9.69231	NE
						Quercus falcata var.pagodifolia	7.15385	NE
						Quercus ilicifolia	4.69231	NW
						Quercus imbricaria	17.6154	NE
						Quercus laevis	6.07692	E
						Quercus laurifolia	1.76923	E
						Quercus lyrata	3.92308	N
						Quercus macrocarpa	4.46154	N
						Quercus marilandica	3.69231	SE
						Quercus michauxii	27.2308	NE
						Quercus muehlenbergii	3.15385	W
						Quercus nigra	23.6923	NE
						Quercus nuttallii	9.84615	N
						Quercus palustris	2.69231	E
						Quercus phellos	14.2308	NE
						Quercus prinus	7.53846	NE
						Quercus rubra	11	NE
						Quercus shumardii	9.92308	N
						Quercus stellata	13.5385	NE
						Quercus stellata var.margaretta	29.2308	E
						Quercus velutina	17.9231	NE
						Quercus virginiana	21	NW
						Robinia pseudoacacia	29.8462	NW
						Salix amygdaloides	13	SW
						Salix nigra	7.38462	N
						Sassafras albidum	10.4615	NE
						Sorbus americana	22.5385	E
						Taxodium distichum	7.84615	E
						Taxodium distichum var. nutans	24.3077	W
						Thuja occidentalis	4.61538	E
						Tilia americana	8.61538	NW
						Tsuga canadensis	6	N
						Ulmus alata	29.9231	NE
						Ulmus americana	7.61538	N
						Ulmus crassifolia	41.5385	NE
						Ulmus rubra	14.8462	N
						Ulmus thomasii	14.6923	NE
Eastern USA	Zolkos et al. (2015)86	Latitude/Longitude	2000 vs. 2100 low emissions	Mean	All	Abies balsamea	34.71	unknown
						Acer pensylvanicum	20.62	unknown
						Acer rubrum	10.67	unknown
						Acer saccharinum	18.59	unknown
						Acer saccharum	18.84	unknown
						Acer spicatum	20.03	unknown
						Betula alleghaniensis	19.71	unknown
						Carya glabra	19.43	unknown
						Carya texana	33.37	unknown
						Carya tomentosa	19.39	unknown
						Fagus grandifolia	17.72	unknown
						Fraxinus americana	12.58	unknown
						Liquidambar styraciflua	20.15	unknown
						Liriodendron tulipifera	20.49	unknown
						Picea rubens	23.09	unknown
						Pinus echinata	23.56	unknown
						Pinus elliottii	14.18	unknown
						Pinus palustris	17.87	unknown
						Pinus taeda	16.36	unknown
						Pinus virginiana	22.36	unknown
						Populus tremuloides	13.98	unknown
						Prunus serotina	13.05	unknown
						Quercus alba	15.25	unknown
						Quercus falcata falcata	21.11	unknown
						Quercus prinus	23.52	unknown
						Quercus rubra	15.83	unknown
						Quercus stellata	26.1	unknown
						Quercus velutina	19.43	unknown
						Tsuga canadensis	20.77	unknown
						Ulmus alata	20.23	unknown
			2000 vs. 2100 high emissions			Abies balsamea	56.43	unknown
						Acer pensylvanicum	43.28	unknown
						Acer rubrum	22.17	unknown
						Acer saccharinum	22.35	unknown
						Acer saccharum	32.88	unknown
						Acer spicatum	44.76	unknown
						Betula alleghaniensis	41.67	unknown
						Carya glabra	28.99	unknown
						Carya texana	50.7	unknown
						Carya tomentosa	30.77	unknown
						Fagus grandifolia	30.59	unknown
						Fraxinus americana	19.76	unknown
						Liquidambar styraciflua	37.59	unknown
						Liriodendron tulipifera	28.82	unknown
						Picea rubens	40.87	unknown
						Pinus echinata	39.82	unknown
						Pinus elliottii	33.43	unknown
						Pinus palustris	41.49	unknown
						Pinus taeda	36.21	unknown
						Pinus virginiana	43.15	unknown
						Populus tremuloides	15.77	unknown
						Prunus serotina	23.9	unknown
						Quercus alba	21.16	unknown
						Quercus falcata falcata	39.41	unknown
						Quercus prinus	37.58	unknown
						Quercus rubra	26.03	unknown
						Quercus stellata	41.81	unknown
						Quercus velutina	27.57	unknown
						Tsuga canadensis	39.89	unknown
						Ulmus alata	32.27	unknown
Northern Spain	Hernández et al. (2014)87	Latitude	1971 vs. 2009-2010	Mean	All	Pinus sylvestris	0.375	N
						Fagus sylvatica	0.5	N
